# Supplementary material for: Photoluminescence and conductivity studies of anthracene-functionalized ruthenium nanoparticles
Source: Royal Society of Chemistry journal article supplement (doi:10.1039/c1nr10158g), 2011-01-01
Supplement: c1nr10158g.pdf [file c1nr10158g.pdf]

*Electronic Supplementary Information*

## Photoluminescence and Conductivity Studies of Anthracene-Functionalized Ruthenium Nanoparticles

Wei Chen, Sulolit Pradhan, and Shaowei Chen\*

*Department of Chemistry and Biochemistry, University of California, 1156 High Street, Santa Cruz, California 95064*

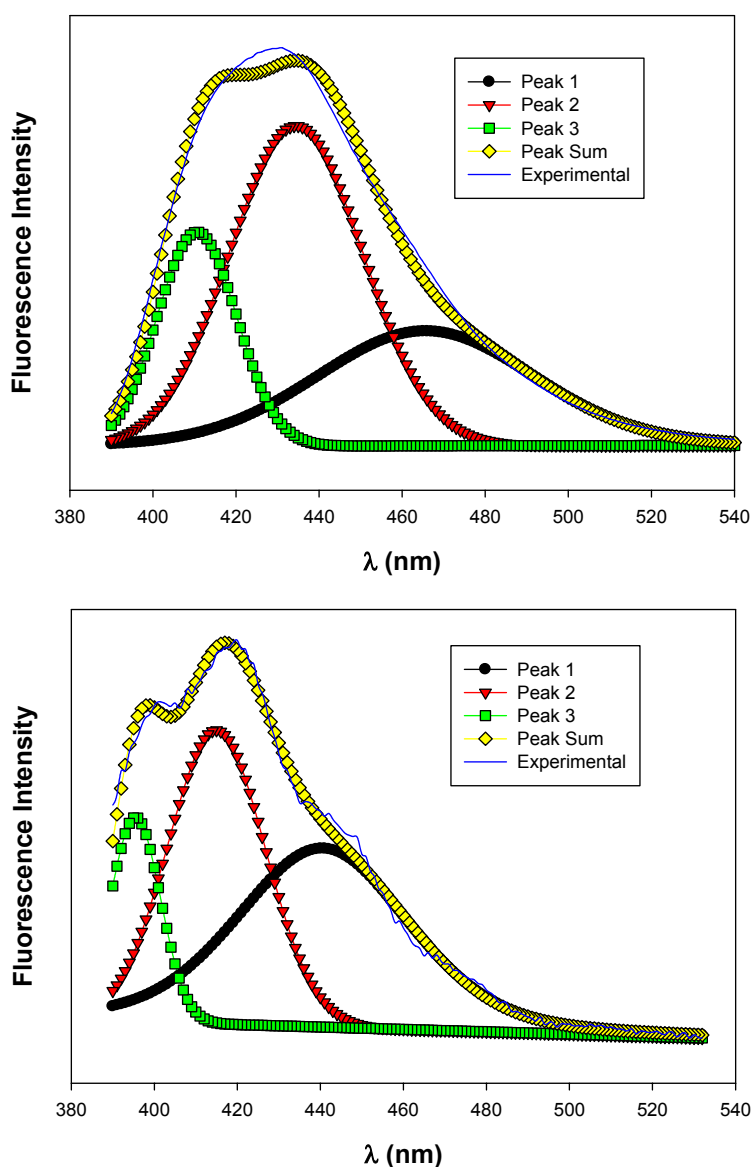

**Figure S1.** Deconvolution of the emission profiles of (top panel) 9-vinylanthracene and (bottom panel) Ru=VAN nanoparticles. The experimental data are the same as those shown in Figure 4.

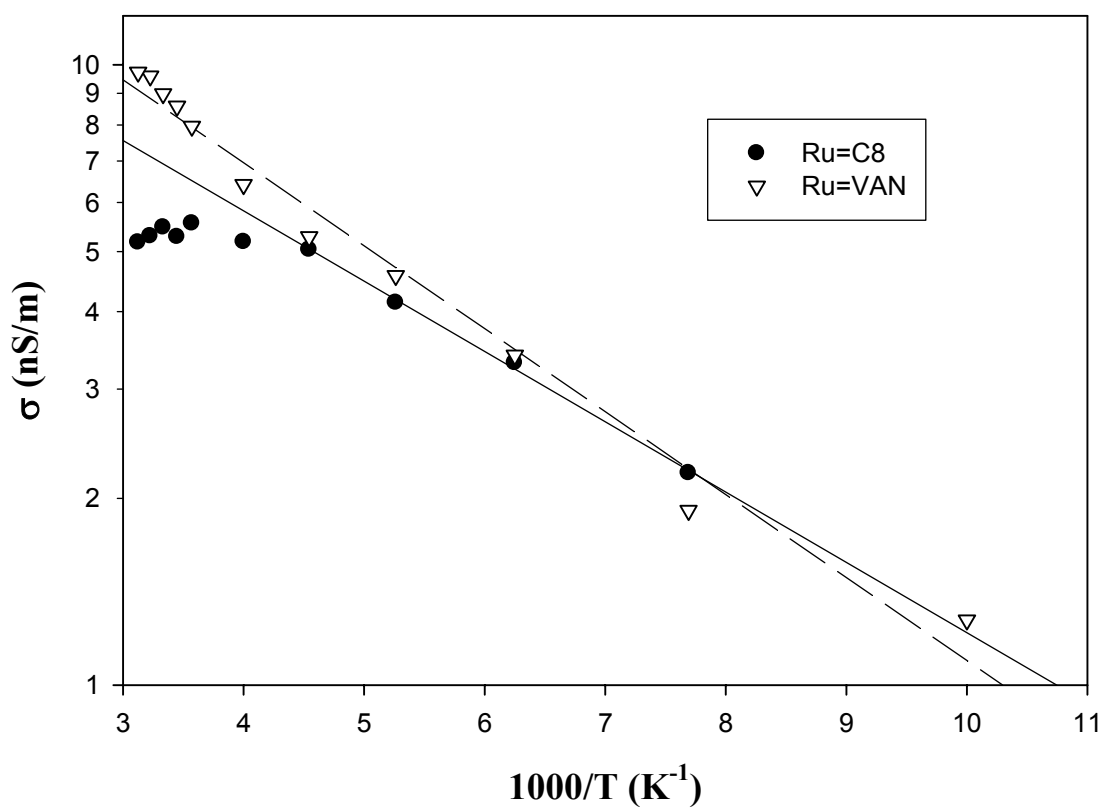

**Figure S2.** Arrhenius plots of the temperature dependence of the electronic conductivity of Ru=C8 and Ru=VAN nanoparticles. Symbols are the same experimental data as those shown in Figure 6 and lines are linear regressions within the temperature range of 100 to 280 K.
